# Supplementary material
Source: PubMed Central journal article supplement (PMC11572106)
Supplement: sj-pdf-1-jcb-10.1177_0271678X241270485.pdf [file sj-pdf-1-jcb-10.1177_0271678X241270485.pdf]

## Supplemental material

Table S1. Key baseline characteristics and outcomes of patients

| Patient ID                                               | 1        | 2        | 3        |
|----------------------------------------------------------|----------|----------|----------|
| Age                                                      | 62       | 50       | 60       |
| Gender                                                   | Male     | Male     | Male     |
| IVT                                                      | -        | +        | +        |
| NIHSS score at admission                                 | 14       | 17       | 15       |
| Premorbid mRS                                            | 0        | 0        | 0        |
| Time from LKW to arrival of treating hospital            | 4h       | 6h       | 11h      |
| Occlusion site                                           | MCA+ICA  | MCA      | MCA      |
| ASPECT                                                   | 9        | 9        | 8        |
| Final mTICI                                              | 3        | 3        | 3        |
| Velocity of hypothermia saline infusion                  | 30ml/min | 30ml/min | 30ml/min |
| Cooling Time                                             | 10min    | 10min    | 10min    |
| Volume of infused hypothermia saline                     | 300ml    | 300ml    | 300ml    |
| Eardrum temperature prior to hypothermia saline infusion | 37°C     | 37°C     | 37°C     |
| Eardrum temperature after hypothermia saline infusion    | 35.8°C   | 35.8°C   | 35.8°C   |
| mRS at 90 days                                           | 3        | 2        | 2        |
| ICH                                                      | 0        | 0        | 0        |
| sICH                                                     | 0        | 0        | 0        |

Abbreviations: IVT, Intravenous Thrombolysis; NIHSS, NIHSS, National Institutes of Health Stroke Scale; mRS, modified Rankin Scale; LKW, last known well; MCA, middle cerebral artery; ICA, internal carotid artery; mTICI, modified Thrombolysis in Cerebral Infarction; sICH, Symptomatic intracranial hemorrhage.
